# Supplementary material for: Nitric oxide-mediated posttranslational modifications control neurotransmitter release by modulating complexin farnesylation and enhancing its clamping ability
Source: PLoS Biol. 2018 Apr 9;16(4):e2003611. doi: 10.1371/journal.pbio.2003611 (PMC5890968; doi:10.1371/journal.pbio.2003611)
Supplement: S3 Data — The raw data presented in worksheets 1–5 serve as underlying data for Fig 3C–3E, 3G and 3I. (XLSX) [file pbio.2003611.s013.xlsx]

## Sheet: Fig 3C
			variance of mean analysis
	Ca levels		#1			#2			#3			#4			#5			#6			Averages
			mean	Var		mean	Var		mean	Var		mean	Var		mean	Var		mean	Var		mean	Var
Ctrl	0
	0.5		2.57501	0.772048		4.48056	1.9752		7.81243	4.04564		10.8545	3.27405		7.76861	1.74134		9.68301	1.70035		7.19569	2.25144
	0.75		8.76965	3.44642		38.1554	12.9729		30.6011	14.9114		41.5321	12.5346		22.9378	7.97601		18.2568	5.80513		26.7088	9.60777
	2		21.7849	4.98955		82.9957	17.2749					194.142	13.0473		131.937	29.2409		68.9741	23.5436		99.9666	17.6193
	3		56.6306	11.7098		119.672	17.843					199.385	14.188		164.689	11.8385		87.218	11.9193		125.519	13.4997
			mean	Var		mean	Var		mean	Var		mean	Var		mean	Var		mean	Var		mean	Var
NO	0
	0.5		5.31142	2.97262		8.05136	4.43509					11.5886	4.06538		1.82021	0.959522		3.69955	1.93295		6.09422	2.87311
	0.75		21.5037	13.0332		19.1236	11.0592		25.9305	11.4512		27.1198	13.8191		15.696	14.4732		19.3338	10.9219		21.4512	12.4596
	2		54.6015	14.6581		37.9464	22.3608		45.623	13.481		53.5047	16.3784		35.2879	15.3215		59.9836	14.4517		47.8245	16.1086
	3		55.3315	12.6776		79.4594	14.6065		63.518	8.80101		62.4679	10.1716		42.3071	11.073		68.7626	9.62164		61.9744	11.1586

## Sheet: Fig 3D
			Number of release sites
			Ctrl	NO
			437.731	251.011
			450.038	45
			780.331	84.7808
			965.203	63.6085
			516.932	173.436
				83.2656
		Mean	630.047	116.85
		SEM	104.187	32.3288
			p=	0.000644363

## Sheet: Fig 3E
	NO																				Ctrl
	3Ca	mean		2Ca	mean		1.5Ca	mean		1 Ca	mean		0.75 Ca	mean		0.5 Ca	mean				3 Ca	mean		2 Ca	mean		1.5 Ca	mean		1 Ca	mean		0.75 Ca	mean		0.5 Ca	mean
	w118 +NO			w118 +NO			w118 +NO			w118 +NO			w118 +NO			w118 +NO					Ctrl			Ctrl			Ctrl			Ctrl			Ctrl			Ctrl
																																										Sigmoidal, 4PL, X is log(concentration) [2]				Ctrl	NO
																																										Best-fit values
																																										Top				115	58.7
																						76																				Bottom				2.22	~ 1.81e-016
		57			40			42.56			32.9333						1.2								125			98			64.8			29								LogIC50				0.925	1.01
														1.86														137			52.5						9.4					HillSlope				3.15	1.82
		72			37.9																				135						60.4						3.3					IC50				8.41	10.2
																															58.6						3.4					Span				113	~ 58.7
		62.5			65						24.46											119.7			118			120			70.8						6.8					Std. Error
																																					8.7					Top				4.79	5.66
		42.3			26.3			37.8																	148																	Bottom				2.24
														1.72			0.966667					149															2.6					LogIC50				0.0213	0.0691
		68.8			53.5																				87																	HillSlope				0.492	0.789
																																		31								Span				5.76
					72.4						15.62																															Goodness of Fit
																	5.3								51			85.6667														Degrees of Freedom				2	2
					53.4			57.2														164									59.35						4.5					R square (weighted)				0.997	0.988
																	7.7																									Weighted Sum of Squares (1/Y²)				0.00963	0.0344
					53.5																																					Sy.x				0.0694	0.131
																	3.7														56.8											Normality of Residuals
					26.3						36.1714			1.66											83																	D'Agostino & Pearson omnibus K2
																						87.2															7.8					P value
					65			35.34																				93.625														Passed normality test (alpha=0.05)?
																																										P value summary
																																										Constraints
																						99												12.8								Bottom				Bottom > 0.0	Bottom > 0.0
														7.98			8.1											161
																															56.25											Number of points
								68.2																																		Analyzed				6	6
																									137
																																		28.04			7.8
														4.4																	35.2
																	1.8											131.32
														1.66
																									78
								40.6																													9.7
																															84			18
														1.18
																												105.25
								72																													19.3
																															81
																																		34
														5.18
								74.4																				154
																															106
														7.18
																																		23
								47.4
																												94.0333
																															75.8
														13.5																				28.9
														32.6
																												165			99
																																		26
														5.7
																															120
														15.3
																												151
																												140.975
																												114.933
																												102.333
																												84
																												115
																												135
	mean	60.52			49.33			52.8333			27.2962			7.68615			4.10952					115.817			106.889			121.563			72.0333			25.6378			7.57273
	SEM	5.2375			5.1133			5.14298			4.60909			2.42627			1.1347					13.2641			11.0321			6.20198			5.84296			2.22558			1.40519

## Sheet: Fig 3G
	ISI	ms		200	100	40	20	10				200	100	40	20	10
	f			5Hz	10Hz	25Hz	50Hz	100Hz				5Hz	10Hz	25Hz	50Hz	100Hz
	NMJ1			0.945342
					0.938922							0.95614
						0.93765							0.985325
							1.00908							1.18616
								0.90471							1.13864
																1.23111
	NMJ2							1.68
							1.28902
						0.75
					0.953895
				0.928339
	NMJ3			0.96506
						0.978311
					0.957324							1.30909
							0.997625						1.22807
								0.943925						1.38182
															1.39286
																1.07931
	NMJ4			1.11302
					1.14081
						1.21504						1.13854
							1.23258						1.3795
								1.22199						1.56037
															1.71609
																1.50909
	NMJ5			1.02706
					1.00117
						1.04116						0.827901
							1.07103						0.853887
								1.0376						1.35
															1.32308
																1.10857
	NMJ6			0.910581
					1.12456							1.0084
						1.22411							1.03361
							1.19655							1.0885
								1.23793							1.14912
																0.979798
	NMJ7			0.908163								1.22222
					0.912088								1.08
						0.923913								1.13462
							0.89234								0.886792
								0.6077								0.730769
												1.11905
													1.3
	NMJ8				1.00316									1.33333
						0.873846									1.38462
							1.14779
								0.929104
	NMJ9			1.09956
					1.19048
						1.30612
							1.30952
								1.02083				1.05
													1.11842
	NMJ10													1.16216
				0.864048											1.3913
					0.970874
						1.21684
							1.14173					1.02326
								0.728749					1.1087
														1.17308
															1.3617
	NMJ11			1.12013
					0.977914
						0.823691						1.07143
							0.992218						1.06757
								1.04447						1.02163
															1.18056
																0.986111
	NMJ12			1.00286
					1.18402
						1.15395
							1.1221
								0.812287
	NMj13			1.06623
					0.992414
						1.02615
							0.919682
								0.878173
	NMJ14
				0.957854
					0.979492
						0.939781
							0.810225
								0.71344
	NMJ15						1.19444
				0.870968
					1.08824
						1.18182
								0.835821
	NMJ16			0.938144
					0.980392
						1.11458
							0.892473
								0.608247
	NMJ17
				0.986014
					1.27699
						1.09751
							1.08738
								1.16632
	NMj18			0.997403
					1.04667
						1.16049
							1.14458
								0.73
	NMJ19			0.87963
					1.03883
						0.913043
							1
	NMJ20			0.916667
					0.993103
						0.993243
							0.929936
	NMJ21			0.905882
					0.850575
						0.905882
							0.952941
	NMJ22			0.987654
					1.11842
						1.02532
							0.844156
								0.696203
	NMJ23			1.07143
					1.06757
						1.11842
							1.18056
								0.986111
		mean		0.975547	1.03426	1.04004	1.05904	0.939181				1.0726	1.11551	1.23917	1.29248	1.08925
		SEM		0.0168611	0.0210997	0.0302251	0.0298182	0.0573202				0.0428601	0.0485471	0.0515034	0.0695087	0.0910244

## Sheet: Fig 3I
		Ctrl								NO
		F1		F2		DF/F0				F1		F2		DF/F0
		43319.9		65288.1		0.507117				37044.2		61661.2		0.66453
		58534.3		65532		0.119549				31664.1		62487.1		0.973436
		53635.2		65532		0.22181				26784.8		63460.7		1.36928
		45323.7		63906.5		0.410003				38644.9		77168.5		0.996862
		44169.2		64545.6		0.461325				42407.4		63704.6		0.502206
		40456.3		65490.3		0.618791				35682		61816.6		0.73243
		26950.3		65530.9		1.43154				32473.9		65226.3		1.00858
		33713.1		65532		0.943815				51995.4		58633.5		0.127669
		35797.8		65532		0.830613				56988.2		65523		0.149765
		46190.1		65362.2		0.415069				46078		75532		0.63922
		28460.3		65375.5		1.29707				28404.1		65532		1.30713
		27109.6		65532		1.4173				50131.1		64752.1		0.291654
		37949.7		59812.5		0.576097				28197.9		65532		1.324
		34992.9		65532		0.872725
		42684.7		65532		0.535258
		52917.5		65532		0.238381
		34360.6		65517.6		0.906767
		34529.4		64415.7		0.86553
					mean	0.70382								0.775904
					SEM	0.0934038								0.119597
